# Supplementary figures and images for: Chiral recognition of 2-(3-benzoylphenyl)propionic acid (ketoprofen) by serum albumin: an investigation with microcalorimetry, circular dichroism and molecular modelling
Source: Royal Society of Chemistry journal article supplement (doi:10.1039/b906021a), 2009-01-01

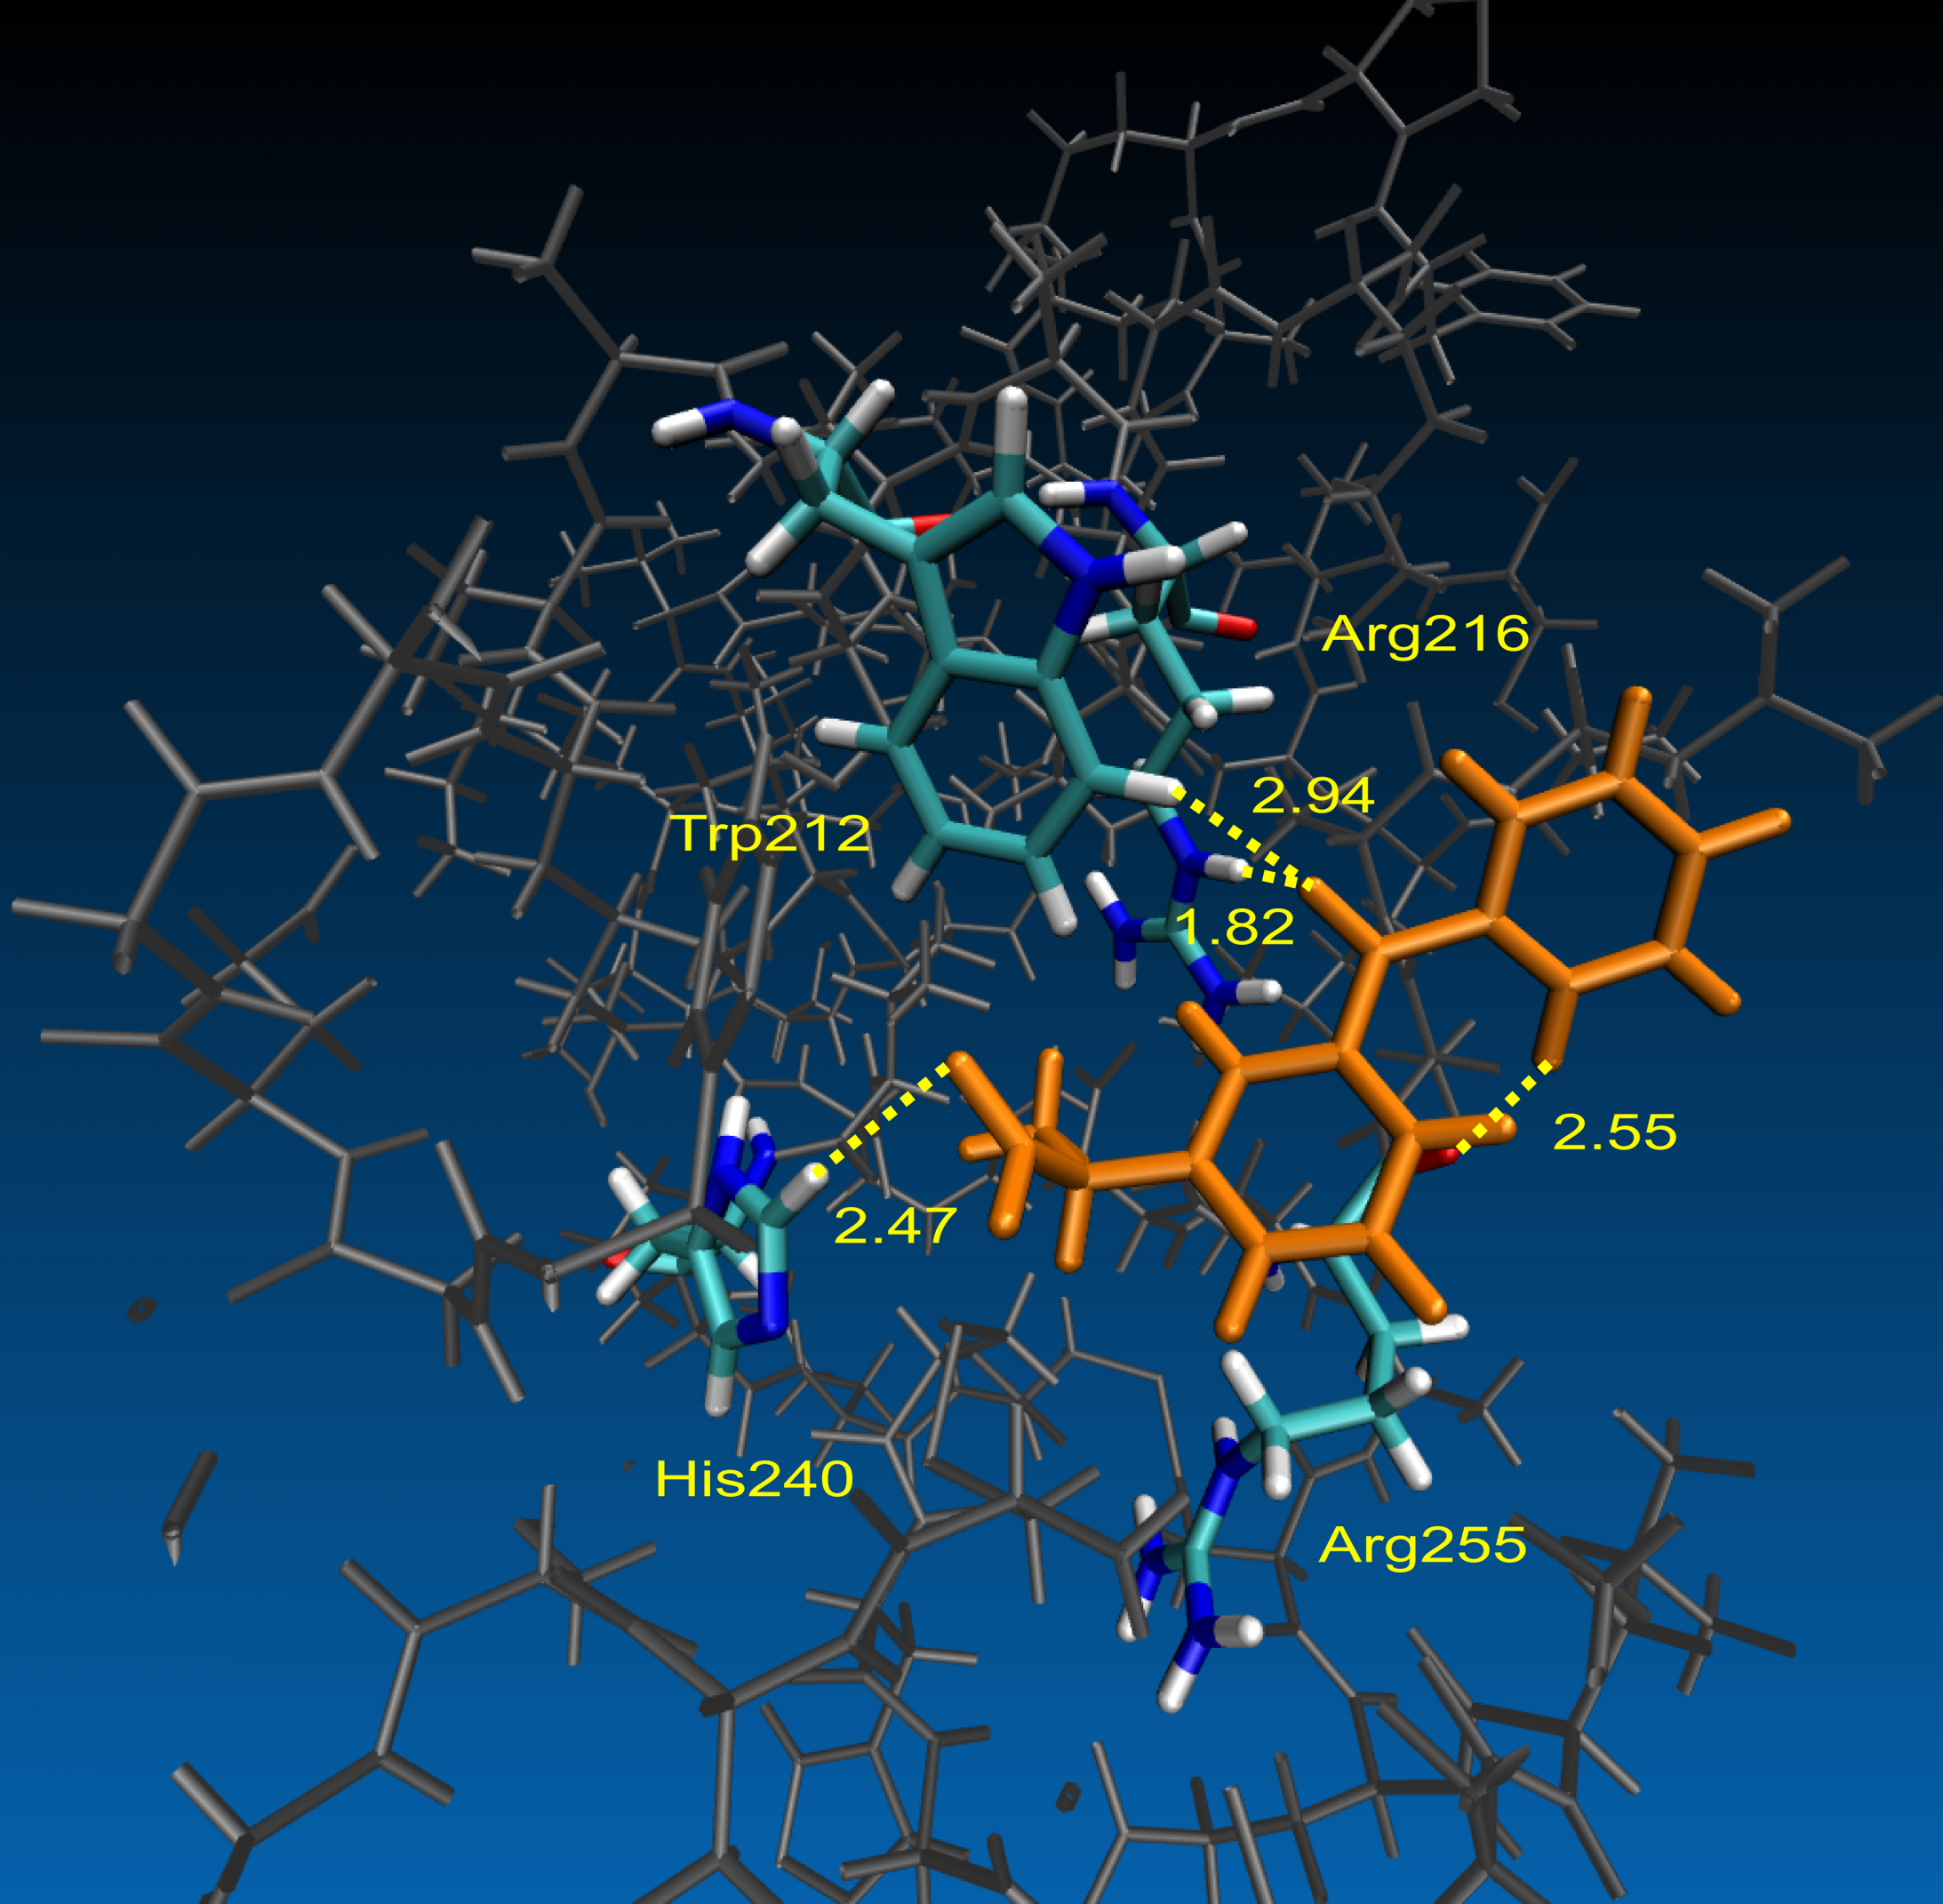

Arg216

Trp212

2.94

1.82

2.55

2.47

His240

Arg255

Supplement: bsadii_skp.pdf [file bsadii_skp.pdf]
